# Supplementary material for: Modified ferroelectric and photovoltaic properties of BiFe0.91Zr0.09O3 thin films via altered annealing atmospheres
Source: Royal Society of Chemistry journal article supplement (doi:10.1039/d1tc03099j), 2021-01-01
Supplement: d1tc03099j1.pdf [file d1tc03099j1.pdf]

Supplementary Information for

**Modified ferroelectric and photovoltaic properties of BiFe<sub>0.91</sub>Zr<sub>0.09</sub>O<sub>3</sub> thin films  
via altered annealing atmospheres**

Zhibiao Ma,<sup>a</sup> Huiying Liu,<sup>a</sup> Lingxu Wang,<sup>a</sup> Bingdong Yao,<sup>a</sup> Yangyang Wang,<sup>a</sup> Yan  
Liu,<sup>a</sup> Fengqing Zhang,<sup>\*a</sup> Weiwei Qin<sup>\*\*b</sup> and Jing Xu<sup>c</sup>

<sup>a</sup> *School of Materials Science and Engineering Shandong Jianzhu University, Jinan,  
250101, Shandong, China.*

<sup>b</sup> *Shandong University of Engineering and Vocational Technology, Jinan, 250200,  
Shandong, China.*

<sup>c</sup> *Laboratory for Microstructure, Shanghai University, Shanghai, 200444.*

\* Corresponding author.

\*\* Corresponding author.

E-mail addresses: zhangfengqing615@163.com (F. Zhang), jiuyuan.1001@163.com  
(W. Qin).

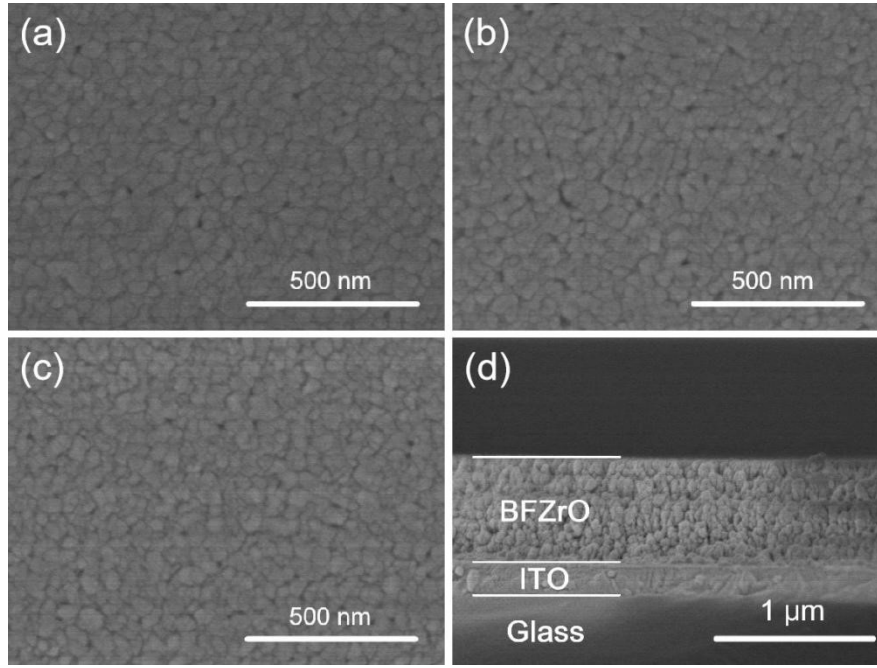

**Fig. S1.** SEM images of BFZrO films annealed under different atmospheres: (a) air; (b) O<sub>2</sub>; (c) N<sub>2</sub>; (d) cross-section diagram.

**Table S1.** Rietveld refinement parameters of BFZrO films annealed under different atmospheres.

| Parameters     | Phases | Fraction(%) | Cell parameters |         |         |      |      |      |                         | R-Factors(%) |      |      | Gof   |
|----------------|--------|-------------|-----------------|---------|---------|------|------|------|-------------------------|--------------|------|------|-------|
|                |        |             | a(Å)            | b(Å)    | c(Å)    | α(°) | β(°) | γ(°) | Volume(Å <sup>3</sup> ) | Rwp          | Rp   | Rexp |       |
| Air            | R3c    | 81.09       | 5.6181          | 5.6181  | 13.7475 | 90   | 90   | 120  | 375.77                  | 4.43         | 3.51 | 1.35 | 3.295 |
|                | Pnma   | 18.91       | 5.6525          | 16.0095 | 11.6029 | 90   | 90   | 90   | 1049.99                 |              |      |      |       |
| O <sub>2</sub> | R3c    | 83.14       | 5.6187          | 5.6187  | 13.7678 | 90   | 90   | 120  | 376.42                  | 5.13         | 4.01 | 1.37 | 3.732 |
|                | Pnma   | 16.86       | 5.5866          | 15.9991 | 11.8044 | 90   | 90   | 90   | 1055.09                 |              |      |      |       |
| N <sub>2</sub> | R3c    | 80.51       | 5.6235          | 5.6235  | 13.7635 | 90   | 90   | 120  | 376.94                  | 3.86         | 2.91 | 1.38 | 2.793 |
|                | Pnma   | 19.49       | 5.6969          | 15.7237 | 11.5352 | 90   | 90   | 90   | 1033.27                 |              |      |      |       |
